# Supplementary material for: Trajectories of Children's Executive Function After Traumatic Brain Injury
Source: PubMed Central journal article supplement (PMC7980098; doi:10.1001/jamanetworkopen.2021.2624), 2021-03-19
Supplement: jamanetwopen-e212624-s001.pdf [file jamanetwopen-e212624-s001.pdf]

## Supplementary Online Content

Keenan HT, Clark AE, Holubkov R, Cox CS Jr, Ewing-Cobbs L. Trajectories of children's executive function after traumatic brain injury. *JAMA Netw Open*. 2021;4(3):e212624. doi:10.1001/jamanetworkopen.2021.2624

**eTable 1.** Description of Cohort by Follow Up Status

**eTable 2.** BRIEF Outcome Models

**eTable 3.** BRIEF Outcomes, TBI vs Orthopedic Injury Group, Preinjury to 36 Months

**eTable 4.** Effect of Preinjury Family Characteristics on BRIEF Outcomes

**eFigure 1.** Cohort Flow Diagram

**eFigure 2.** BRIEF Emotional Control Outcomes Over Time by Injury Group and Age (Spanish Language Preference)

**eFigure 3.** BRIEF Inhibit Outcomes Over Time by Injury Group and Age (Spanish Language Preference)

**eFigure 4.** BRIEF Memory Working Outcomes Over Time by Injury Group and Age (Spanish Language Preference)

**eFigure 5.** BRIEF Plan-Organize Outcomes Over Time by Injury Group and Age (Spanish Language Preference)

This supplementary material has been provided by the authors to give readers additional information about their work.

**eTable 1. Description of Cohort by Follow Up Status**

|                                                    | Follow up completed |                  | P-value <sup>a</sup> |
|----------------------------------------------------|---------------------|------------------|----------------------|
|                                                    | No<br>(N = 66)      | Yes<br>(N = 559) |                      |
| <b>Enrollment site</b>                             |                     |                  | <0.001               |
| Utah                                               | 17 (26%)            | 325 (58%)        |                      |
| Texas                                              | 49 (74%)            | 234 (42%)        |                      |
| <b>Age (years) at injury, mean (SD)</b>            | 9.3 (4.9)           | 8.6 (4.4)        | 0.21                 |
| <b>Child sex</b>                                   |                     |                  | 0.09                 |
| Boy                                                | 49 (74%)            | 356 (64%)        |                      |
| Girl                                               | 17 (26%)            | 203 (36%)        |                      |
| <b>Preferred language</b>                          |                     |                  | 0.99                 |
| English                                            | 58 (88%)            | 491 (88%)        |                      |
| Spanish                                            | 8 (12%)             | 68 (12%)         |                      |
| <b>Child race/ethnicity</b>                        |                     |                  | <0.001               |
| Hispanic or Latino                                 | 24 (37%)            | 151 (27%)        |                      |
| White, non-Hispanic                                | 22 (34%)            | 328 (59%)        |                      |
| Black, non-Hispanic                                | 9 (14%)             | 40 (7%)          |                      |
| Other, non-Hispanic                                | 10 (15%)            | 34 (6%)          |                      |
| <b>Income relative to poverty level, mean (SD)</b> | 2.5 (2.0)           | 2.8 (1.9)        | 0.35                 |
| <b>McMaster family functioning, mean (SD)</b>      | 1.7 (0.5)           | 1.5 (0.5)        | 0.004                |
| <b>Social capital index, mean (SD)</b>             | 3.0 (1.1)           | 3.5 (1.0)        | <0.001               |
| <b>Injury group and severity</b>                   |                     |                  | 0.72                 |
| Mild TBI                                           | 19 (29%)            | 155 (28%)        |                      |
| Complicated mild/moderate                          | 17 (26%)            | 162 (29%)        |                      |
| Severe TBI                                         | 14 (21%)            | 90 (16%)         |                      |
| Orthopedic                                         | 16 (24%)            | 152 (27%)        |                      |

<sup>a</sup> P-value based on chi-square test for categorical variables and t-test for continuous variables.

**eTable 2. BRIEF Outcome Models**

| <b>Outcome</b>           | <b>Model terms included<sup>a</sup></b> | <b>P-value<sup>b</sup></b> |
|--------------------------|-----------------------------------------|----------------------------|
| <b>Emotional Control</b> | Injury Group * Time <sup>3</sup>        | p=0.04                     |
|                          | Age at Injury * Child Sex               | p=0.01                     |
|                          | Preferred language                      | p<0.001                    |
|                          | Family function * Time                  | p=0.01                     |
|                          | Social capital                          | p=0.003                    |
|                          |                                         |                            |
| <b>Inhibit</b>           | Injury Group * Time <sup>2</sup>        | p=0.01                     |
|                          | Age at Injury * Child Sex               | p<0.001                    |
|                          | Age at Injury * Time                    | p=0.01                     |
|                          | Preferred language * Time <sup>3</sup>  | p=0.03                     |
|                          | Family function * Time                  | p=0.01                     |
|                          | Social capital                          | p=0.01                     |
| <b>Working Memory</b>    | Injury Group * Time <sup>3</sup>        | p=0.001                    |
|                          | Age at Injury * Child Sex               | p=0.03                     |
|                          | Preferred language * Time <sup>3</sup>  | p=0.03                     |
|                          | Family function * Time                  | p=0.01                     |
|                          | Social capital * Time <sup>3</sup>      | p=0.004                    |
|                          |                                         |                            |
| <b>Plan /organize</b>    | Injury Group * Time                     | p=0.001                    |
|                          | Age at Injury * Time                    | p=0.01                     |
|                          | Child Sex                               | p=0.03                     |
|                          | Preferred language                      | p=0.002                    |
|                          | Family function * Time                  | p=0.04                     |
|                          | Social capital                          | p=0.01                     |

<sup>a</sup> All models included the a priori predictors: time since injury, injury type and severity, age at injury, child sex, preferred language, family function and social capital. Site was not important in any model. Model terms shown include only the highest interaction term in the model. All related lower-order terms are also included. For example, for BRIEF Inhibit, the higher order term Injury Group\*Time<sup>2</sup> implies the inclusion of Time, Time<sup>2</sup>, InjuryGroup, InjuryGroup\*Time, and Injury Group\*Time<sup>2</sup>.

<sup>b</sup> P-value reflects overall significance of interaction term or main effect shown.

**eTable 3. BRIEF Outcomes, TBI vs Orthopedic Injury Group, Preinjury to 36 Months**

| BRIEF T-score            | Differences in change over time <sup>a</sup> |                   |                  |                         |
|--------------------------|----------------------------------------------|-------------------|------------------|-------------------------|
|                          | Pre-injury to 12 months                      | 12 to 24 months   | 24 to 36 months  | Pre-injury to 36 months |
| <b>Emotional Control</b> |                                              |                   |                  |                         |
| Mild vs Ortho            | 2.9 (0.4, 5.3)                               | 0.6 (-1.3, 2.5)   | -0.5 (-2.3, 1.3) | 2.9 (0.2, 5.6)          |
| cMild vs Ortho           | 4.7 (2.3, 7.1)                               | 0.5 (-1.4, 2.4)   | -1.4 (-3.2, 0.5) | 3.8 (1.1, 6.5)          |
| Severe vs Ortho          | 9.0 (6.0, 11.9)                              | -1.2 (-3.7, 1.4)  | 0.2 (-2.9, 3.3)  | 8.0 (4.1, 11.8)         |
| <b>Inhibit</b>           |                                              |                   |                  |                         |
| Mild vs Ortho            | 0.9 (-0.8, 2.6)                              | 0.6 (-0.2, 1.4)   | 0.3 (-1.1, 1.8)  | 1.9 (-0.5, 4.2)         |
| cMild vs Ortho           | 3.0 (1.3, 4.7)                               | 1.0 (0.2, 1.8)    | -1.0 (-2.5, 0.5) | 3.0 (0.6, 5.3)          |
| Severe vs Ortho          | 3.6 (1.6, 5.6)                               | 1.5 (0.5, 2.4)    | -0.7 (-2.6, 1.2) | 4.4 (1.6, 7.3)          |
| <b>Working Memory</b>    |                                              |                   |                  |                         |
| Mild vs Ortho            | 2.5 (0.1, 4.9)                               | -2.0 (-3.9, 0.03) | 2.3 (0.6, 4.0)   | 2.8 (0.2, 5.5)          |
| cMild vs Ortho           | 4.4 (2.0, 6.8)                               | -0.4 (-2.4, 1.6)  | 0.3 (-1.5, 2.0)  | 4.2 (1.5, 6.9)          |
| Severe vs Ortho          | 7.0 (4.1, 9.9)                               | -2.2 (-4.5, 0.2)  | 1.7 (-0.5, 3.9)  | 6.5 (3.3, 9.8)          |
| <b>Plan/Organize</b>     |                                              |                   |                  |                         |
| Mild vs Ortho            | 1.2 (0.4, 2.0)                               | 1.2 (0.4, 2.0)    | 1.2 (0.4, 2.0)   | 3.6 (1.2, 6.0)          |
| cMild vs Ortho           | 1.2 (0.4, 2.0)                               | 1.2 (0.4, 2.0)    | 1.2 (0.4, 2.0)   | 3.7 (1.2, 6.1)          |
| Severe vs Ortho          | 1.7 (0.7, 2.7)                               | 1.7 (0.7, 2.7)    | 1.7 (0.7, 2.7)   | 5.2 (2.2, 8.2)          |

<sup>a</sup> The mean differences shown reflect a difference between groups for the difference over time. For example, for BRIEF Inhibit, the Severe group T-score increased (worsened) by 4.4 points more than the Orthopedic group from pre-injury to 36 months, on average.

| <b>eTable 4. Effect of Preinjury Family Characteristics on BRIEF Outcomes</b>                                                                                                                                                                                                                                                    |                             |                            |                            |
|----------------------------------------------------------------------------------------------------------------------------------------------------------------------------------------------------------------------------------------------------------------------------------------------------------------------------------|-----------------------------|----------------------------|----------------------------|
|                                                                                                                                                                                                                                                                                                                                  | <b>Pre-injury mean (SE)</b> | <b>12 months mean (SE)</b> | <b>36 months mean (SE)</b> |
| <b>BRIEF Inhibit T-score</b>                                                                                                                                                                                                                                                                                                     |                             |                            |                            |
| Social capital Index (1 point increase)                                                                                                                                                                                                                                                                                          | -1.04 (0.39)                | -1.04 (0.39)               | -1.04 (0.39)               |
| Family function (1 point increase)                                                                                                                                                                                                                                                                                               | 6.83 (0.92)                 | 5.95 (0.89)                | 4.18 (1.16)                |
| <b>BRIEF Emotional T-score</b>                                                                                                                                                                                                                                                                                                   |                             |                            |                            |
| Social capital Index (1 point increase)                                                                                                                                                                                                                                                                                          | -1.22 (0.40)                | -1.22 (0.40)               | -1.22 (0.40)               |
| Family function (1 point increase)                                                                                                                                                                                                                                                                                               | 7.00 (0.94)                 | 6.08 (0.91)                | 4.22 (1.26)                |
| <b>BRIEF Working Memory T-score</b>                                                                                                                                                                                                                                                                                              |                             |                            |                            |
| Social capital Index (1 point increase)                                                                                                                                                                                                                                                                                          | -0.78 (0.43)                | -1.66 (0.50)               | -0.84 (0.58)               |
| Family function (1 point increase)                                                                                                                                                                                                                                                                                               | 6.67 (0.93)                 | 5.72 (0.92)                | 3.81 (1.31)                |
| <b>BRIEF Plan/Organize T-score</b>                                                                                                                                                                                                                                                                                               |                             |                            |                            |
| Social capital Index (1 point increase)                                                                                                                                                                                                                                                                                          | -1.03 (0.38)                | -1.03 (0.38)               | -1.03 (0.38)               |
| Family function (1 point increase)                                                                                                                                                                                                                                                                                               | 6.20 (0.91)                 | 5.48 (0.86)                | 4.04 (1.14)                |
| For all children, higher (worse) family functioning at pre-injury is consistently related to higher (worse) outcomes throughout the 3 years of follow up. This effect attenuates over time. Higher (better) social capital at pre-injury is consistently related to lower (better) outcomes throughout the 3 years of follow up. |                             |                            |                            |

**eFigure 1.** Cohort flow diagram

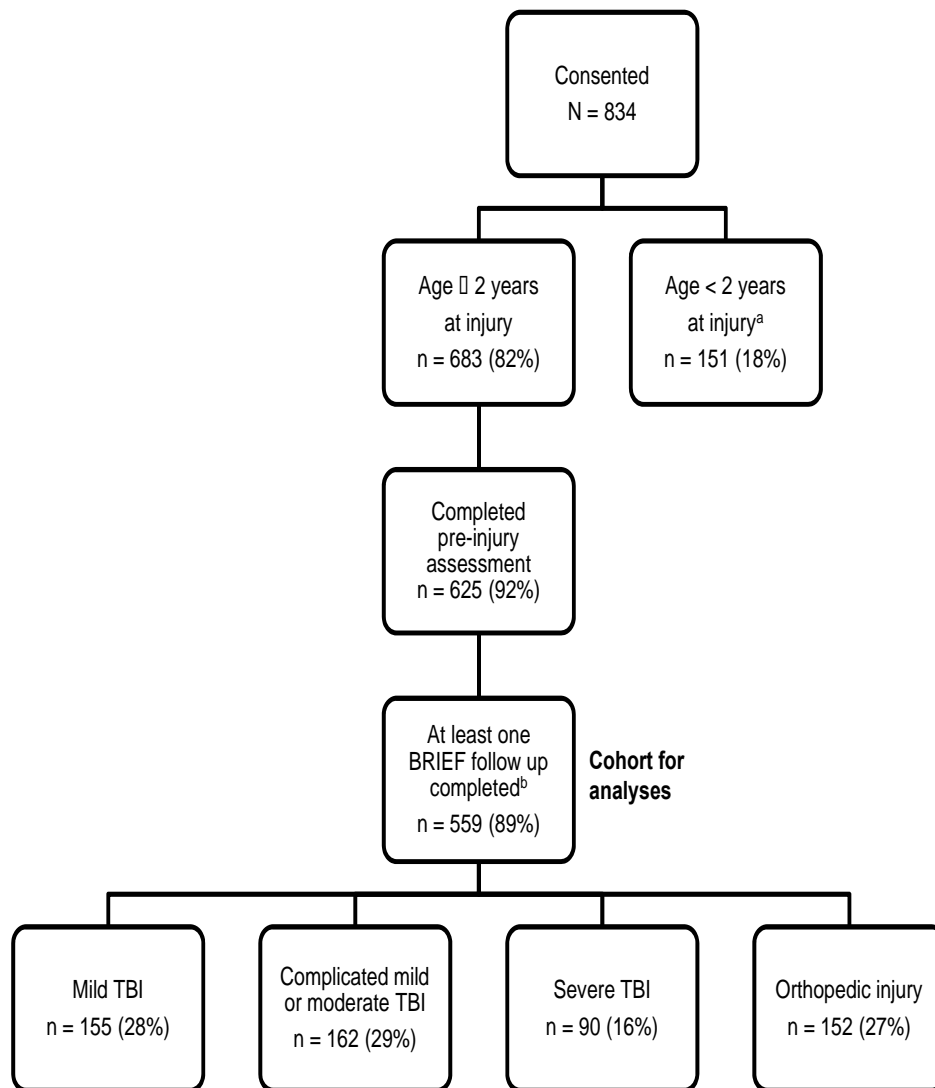

<sup>a</sup> Subjects are not eligible for BRIEF (preschool version) assessments until 2 years of age.

<sup>b</sup> Number of assessments completed at each time point were pre-injury, n=556; 3 months, n=517; 12 months, n=511; 24 months, n=473; and 36 months, n=416.

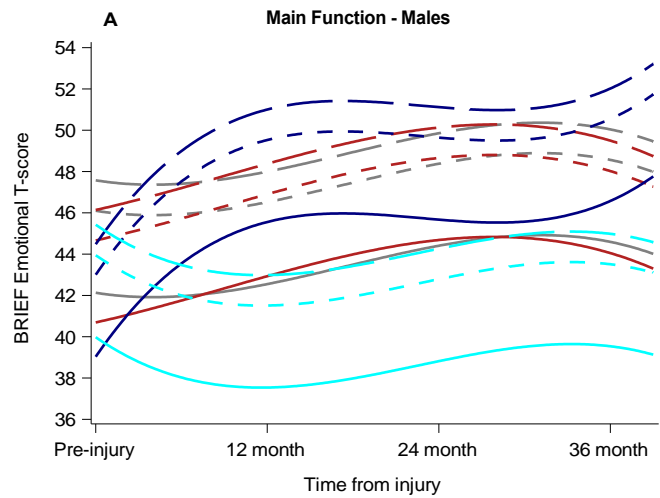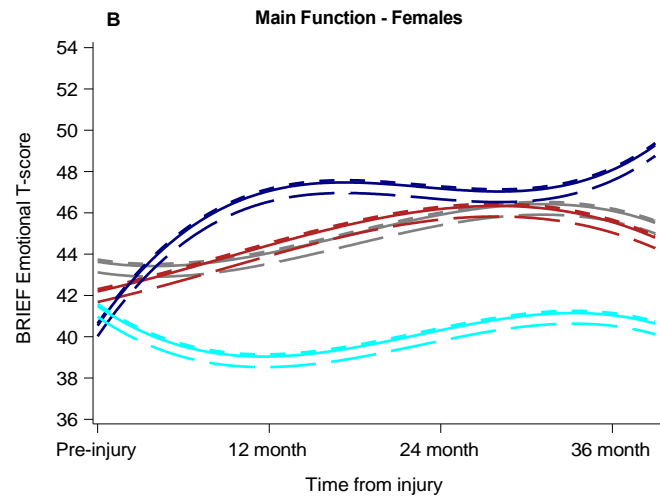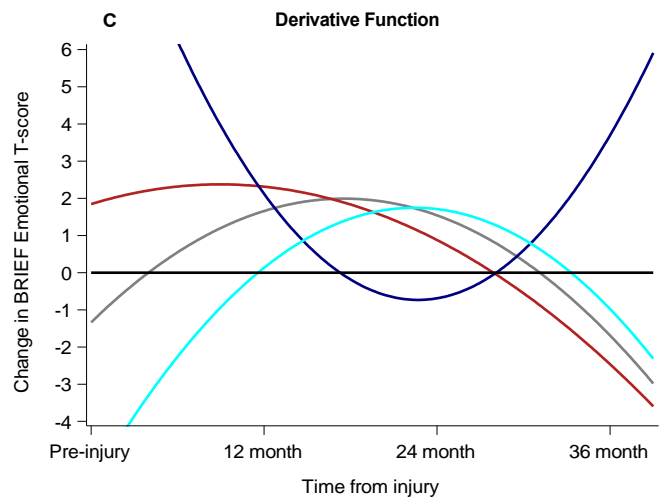

**KEY (Figure parts A, B)**

|             |                |             |             |
|-------------|----------------|-------------|-------------|
| Mild TBI    | cMild/Mod. TBI | Severe TBI  | Orthopedic  |
| — 2-5 yrs   | — 2-5 yrs      | — 2-5 yrs   | — 2-5 yrs   |
| — 6-11 yrs  | — 6-11 yrs     | — 6-11 yrs  | — 6-11 yrs  |
| - - 12+ yrs | - - 12+ yrs    | - - 12+ yrs | - - 12+ yrs |

**KEY (Figure part C)**

|              |                  |
|--------------|------------------|
| — Mild TBI   | — cMild/Mod. TBI |
| — Severe TBI | — Orthopedic     |

**eFigure 2. BRIEF Emotional Control outcomes over time by injury group and age (Spanish language preference).** Parts (A) and (B) display estimated mean outcomes for children of Spanish-speaking families assuming mean values of family function and social capital. Part (C) shows the change in outcome over time. Values above zero indicate that the score is increasing (worsening) while values below zero indicate the score is decreasing (improving).

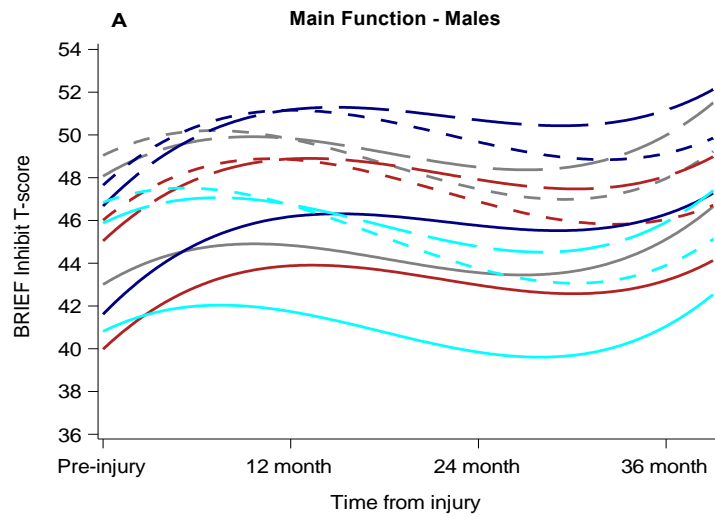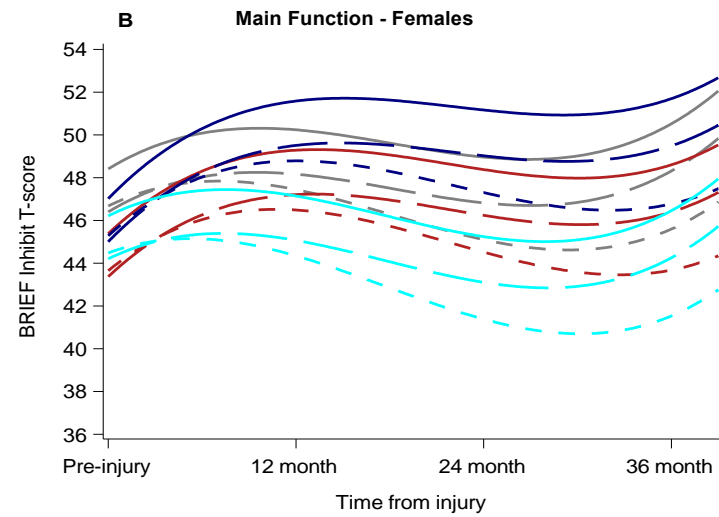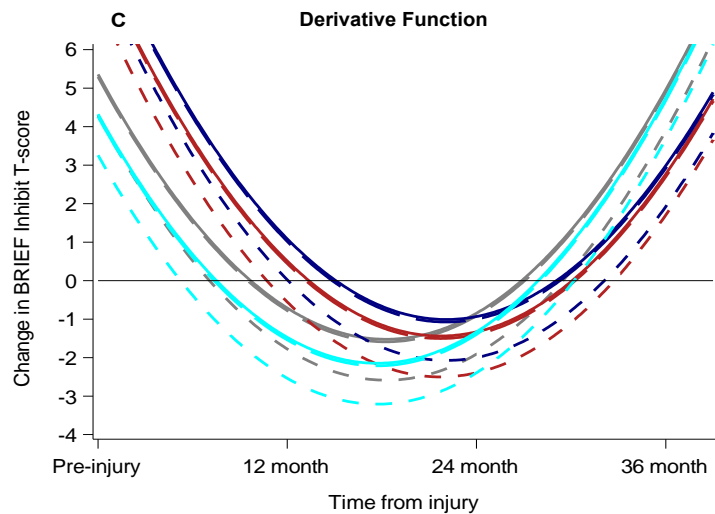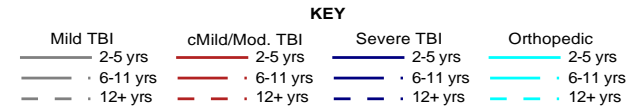

**eFigure 3. BRIEF Inhibit outcomes over time by injury group and age (Spanish language preference).** Parts (A) and (B) display estimated mean outcomes for children of Spanish-speaking families assuming mean values of family function and social capital. Part (C) shows the change in outcome over time. Values above zero indicate that the score is increasing (worsening) while values below zero indicate the score is decreasing (improving).



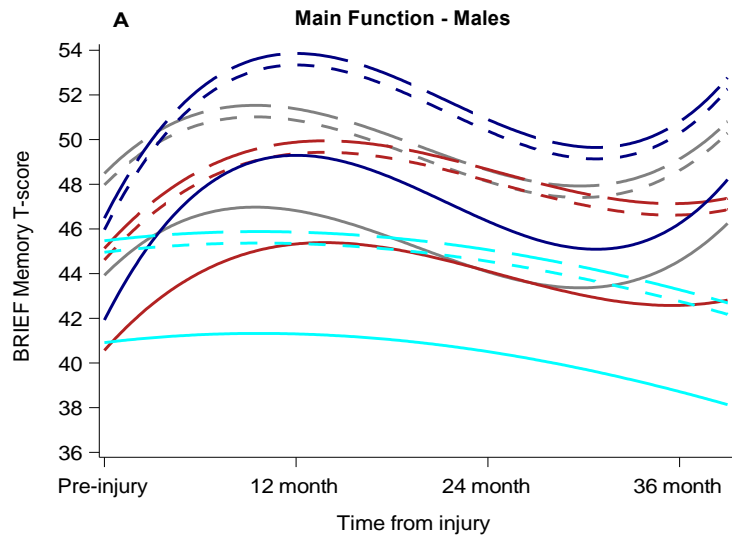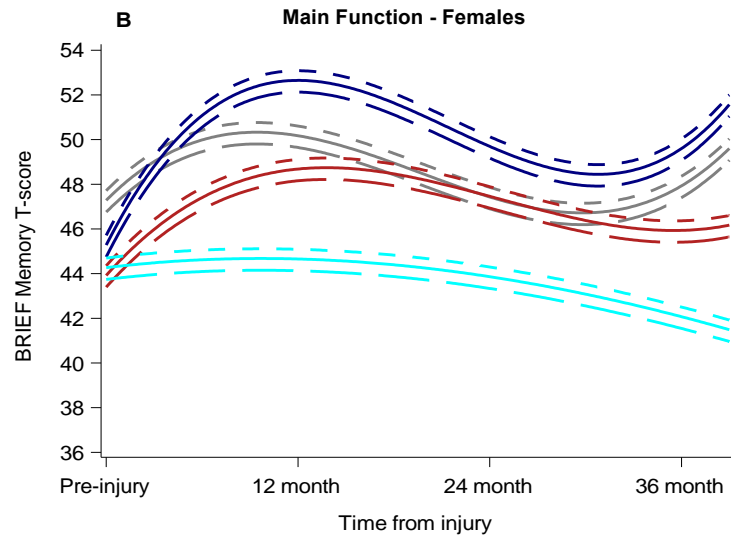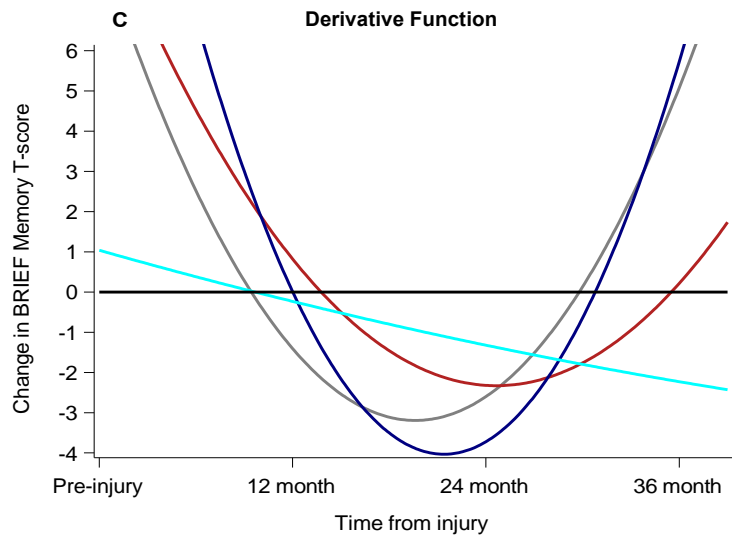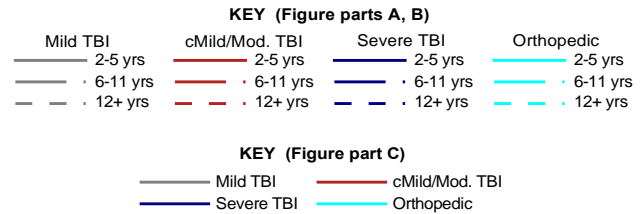

**eFigure 4. BRIEF Working Memory outcomes over time by injury group and age (Spanish language preference).** Parts (A) and (B) display estimated mean outcomes for children of Spanish-speaking families assuming mean values of family function and social capital. Part (C) shows the change in outcome over time. Values above zero indicate that the score is increasing (worsening) while values below zero indicate the score is decreasing (improving).

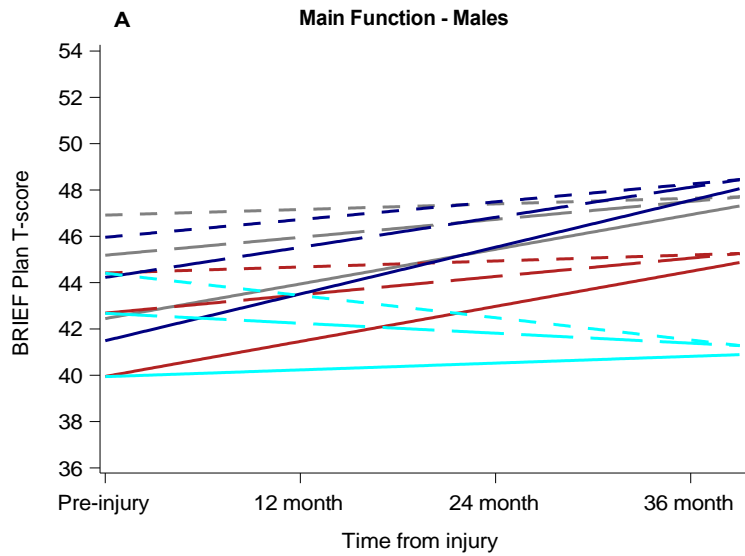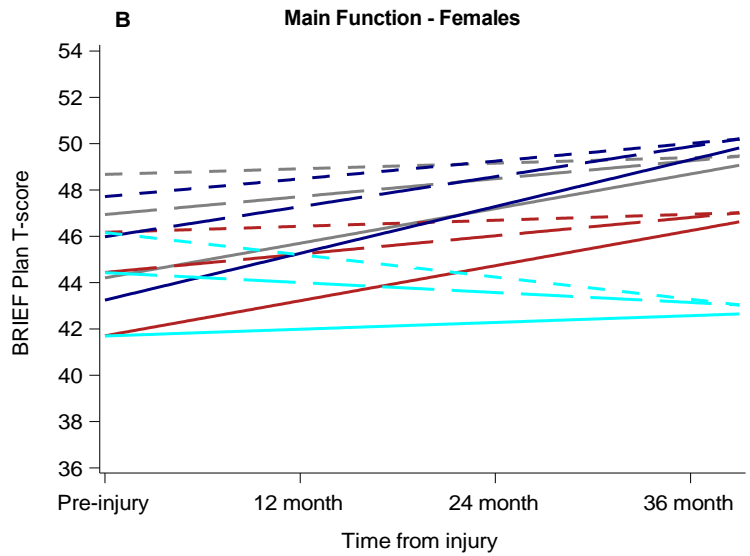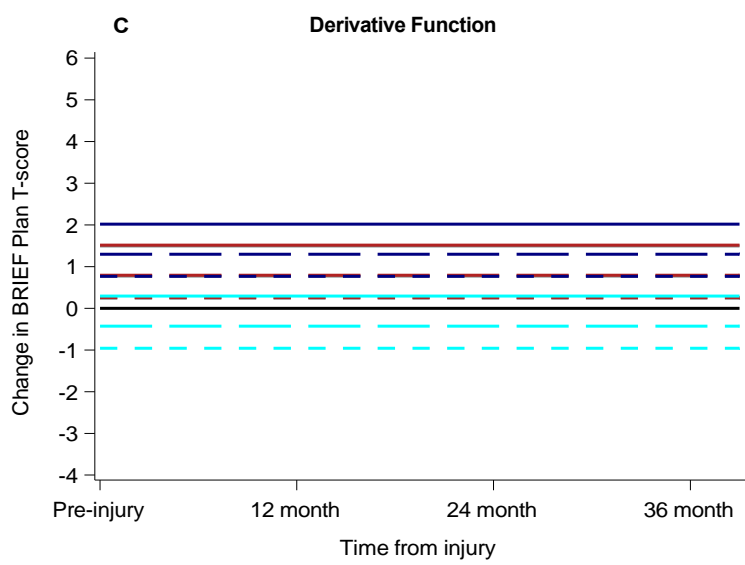

**KEY**

| Mild TBI      | cMild/Mod. TBI | Severe TBI    | Orthopedic    |
|---------------|----------------|---------------|---------------|
| — 2-5 yrs     | — 2-5 yrs      | — 2-5 yrs     | — 2-5 yrs     |
| - - 6-11 yrs  | - - 6-11 yrs   | - - 6-11 yrs  | - - 6-11 yrs  |
| - - - 12+ yrs | - - - 12+ yrs  | - - - 12+ yrs | - - - 12+ yrs |

**eFigure 5. BRIEF Plan/Organize outcomes over time by injury group and age (Spanish language preference).** Graphs (A) and (B) display estimated mean outcomes for children of Spanish-speaking families assuming mean values of family function and social capital. Graph (C) shows the change in outcome over time.
